# Supplementary figures and images for: Mitochondriogenesis and apoptosis: possible cause of vitamin A-mediated adipose loss in WNIN/Ob-obese rats
Source: Springer Nature journal article supplement (doi:10.1186/1743-7075-11-45), 2014-09-25

AI

AII

AIII

AIV

BI

BII

BIII

BIV

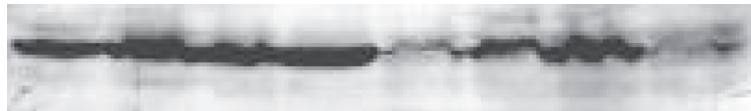

← UCP1

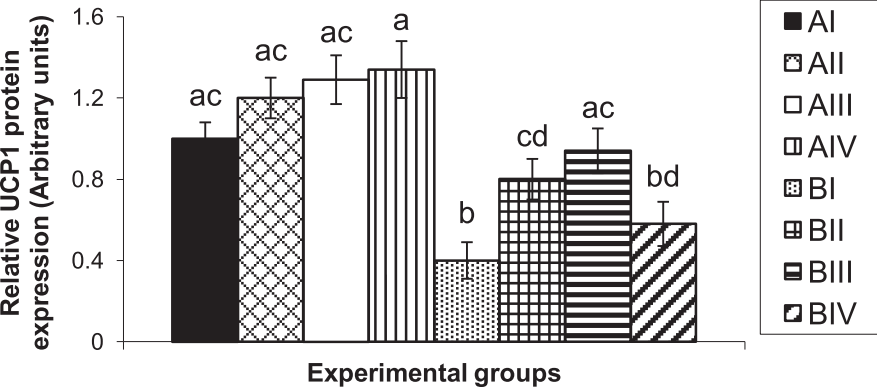

Supplement: 12986_2014_617_MOESM1_ESM.pdf [file 12986_2014_617_MOESM1_ESM.pdf]

**A**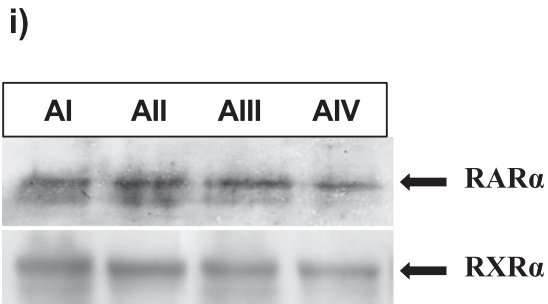**ii)**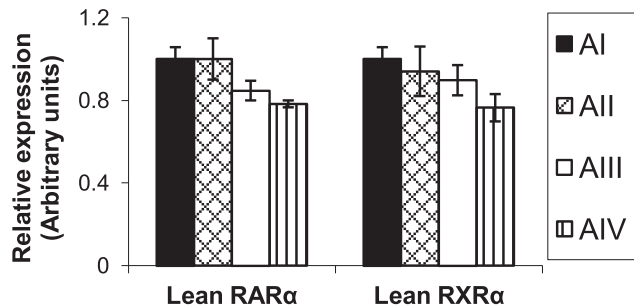**B**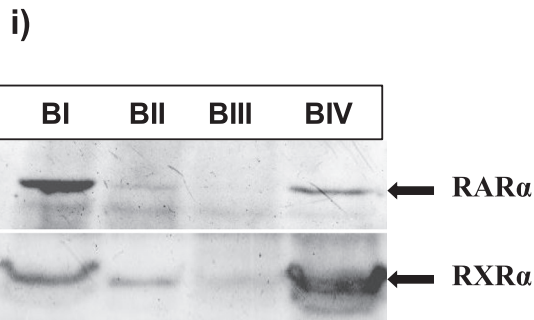**ii)**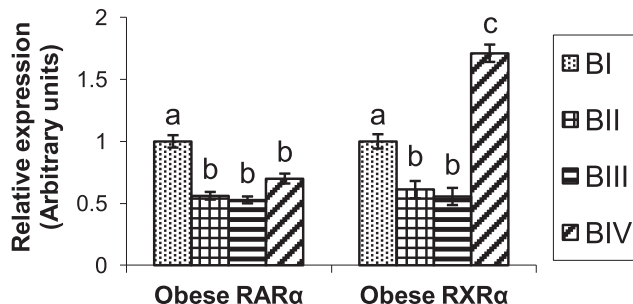

Supplement: 12986_2014_617_MOESM2_ESM.pdf [file 12986_2014_617_MOESM2_ESM.pdf]

# LEAN

AI

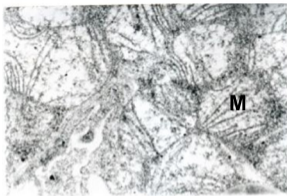

AII

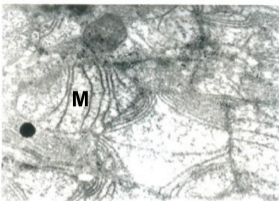

AIII

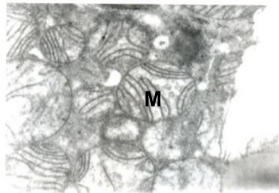

AIV

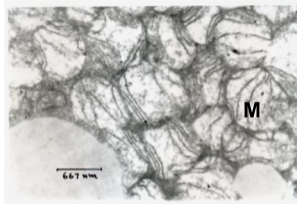

# OBESE

BI

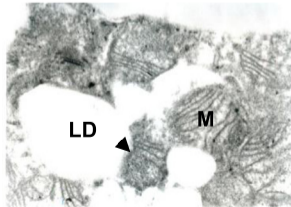

BII

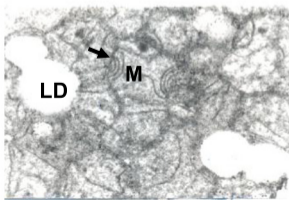

BIII

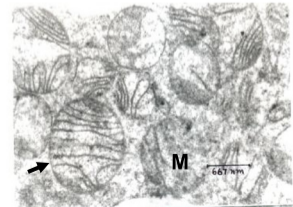

BIV

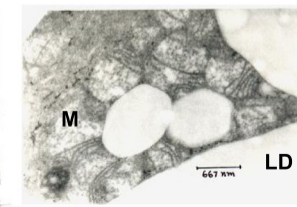

Supplement: 12986_2014_617_MOESM3_ESM.pdf [file 12986_2014_617_MOESM3_ESM.pdf]

**A****i)**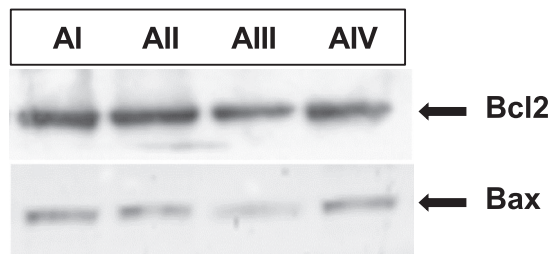**ii)**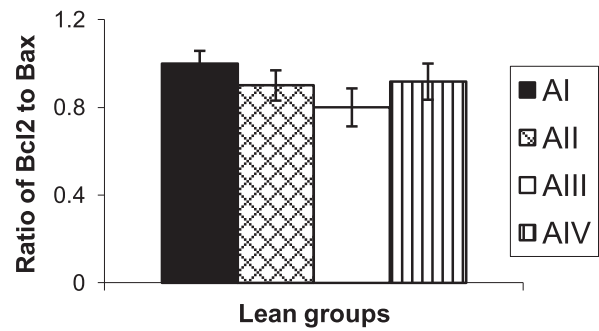**B****i)**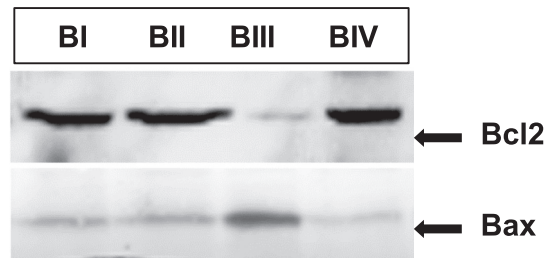**ii)**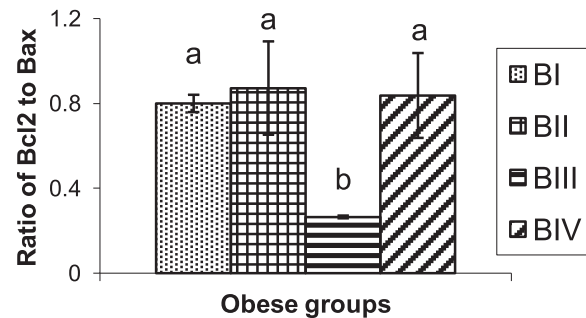

Supplement: 12986_2014_617_MOESM4_ESM.pdf [file 12986_2014_617_MOESM4_ESM.pdf]

## A eWAT Genomic DNA

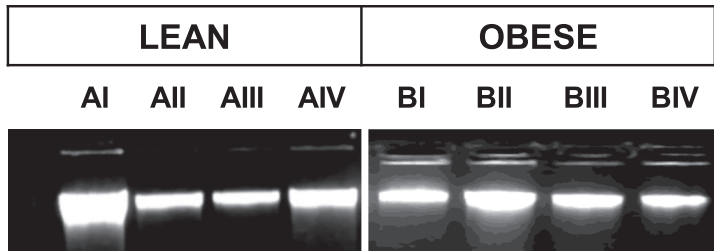

## B eWAT Fragmented DNA

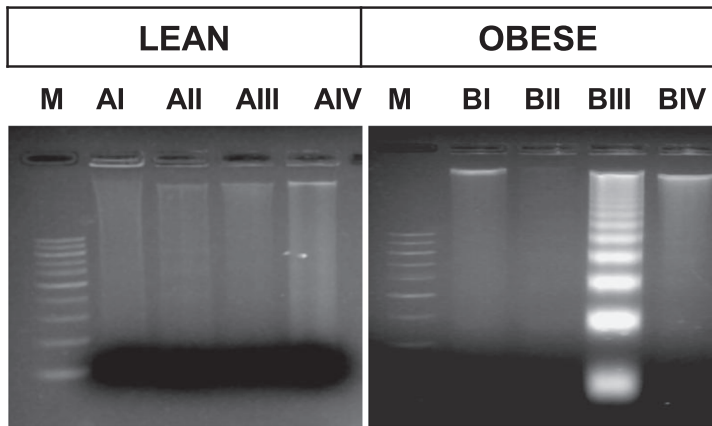

Supplement: 12986_2014_617_MOESM5_ESM.pdf [file 12986_2014_617_MOESM5_ESM.pdf]
